# Supplementary figures and images for: Factors associated with marital status of women with genital fistula after childbirth: a retrospective review in nine African countries
Source: HighWire-hosted journal article supplement (doi:10.1136/bmjopen-2021-055961), 2022-05-01

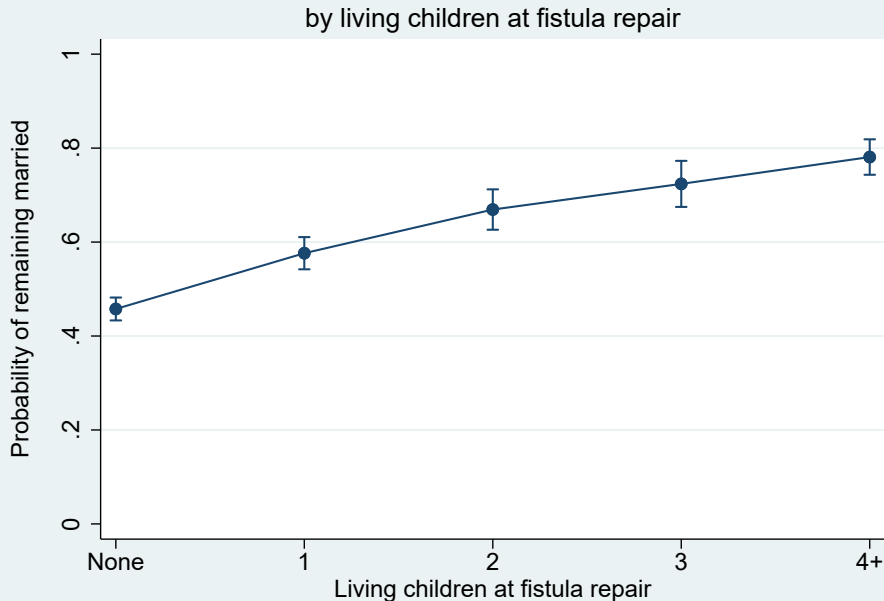

Supplement: bmjopen-2021-055961supp003_data_supplement.pdf [file bmjopen-2021-055961supp003_data_supplement.pdf]

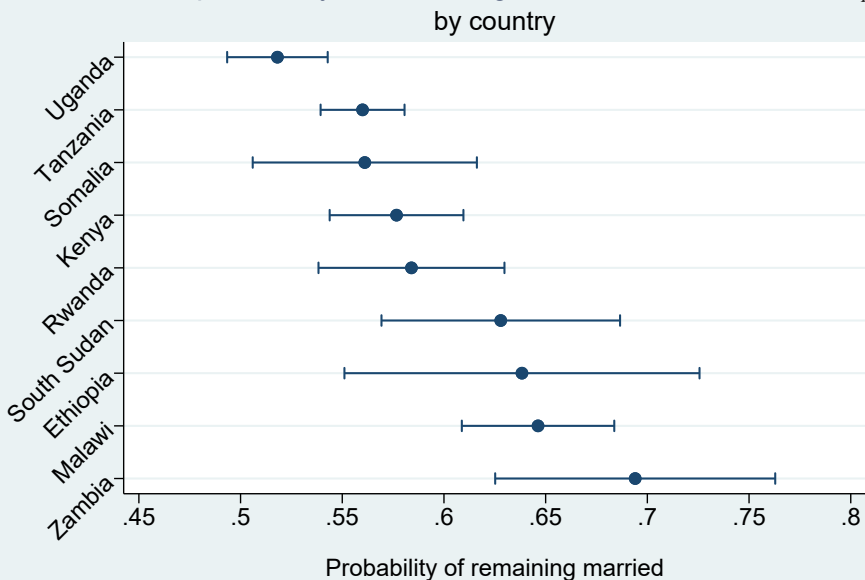

Supplement: bmjopen-2021-055961supp005_data_supplement.pdf [file bmjopen-2021-055961supp005_data_supplement.pdf]
